# Supplementary material for: 8(E)-4-[{2-(2,4-dinitrophenyl)hydrazono}benzene-1,3-diol] as a solvatochromic Schiff base and chromogenic signaling of water content by its deprotonated form in acetonitrile
Source: Royal Society of Chemistry journal article supplement (doi:10.1039/c4ra03249g), 2014-01-01
Supplement: c4ra03249g1.pdf [file c4ra03249g1.pdf]

Electronic Supplementary Material (ESI) for RSC Advances  
This journal is © The Royal Society of Chemistry 2014

## Supplementary Information

**8(E)-4-[[2-(2,4-dinitrophenyl)hydrazono}benzene-1,3-diol] as a solvatochromic Schiff base and chromogenic signaling of water content by its deprotonated form in acetonitrile**

**Karishma Tiwari, Monika Mishra and Vinod P. Singh\***

*Department of Chemistry, Faculty of Science, Banaras Hindu University, Varanasi, Uttar Pradesh 221005,*

*India*

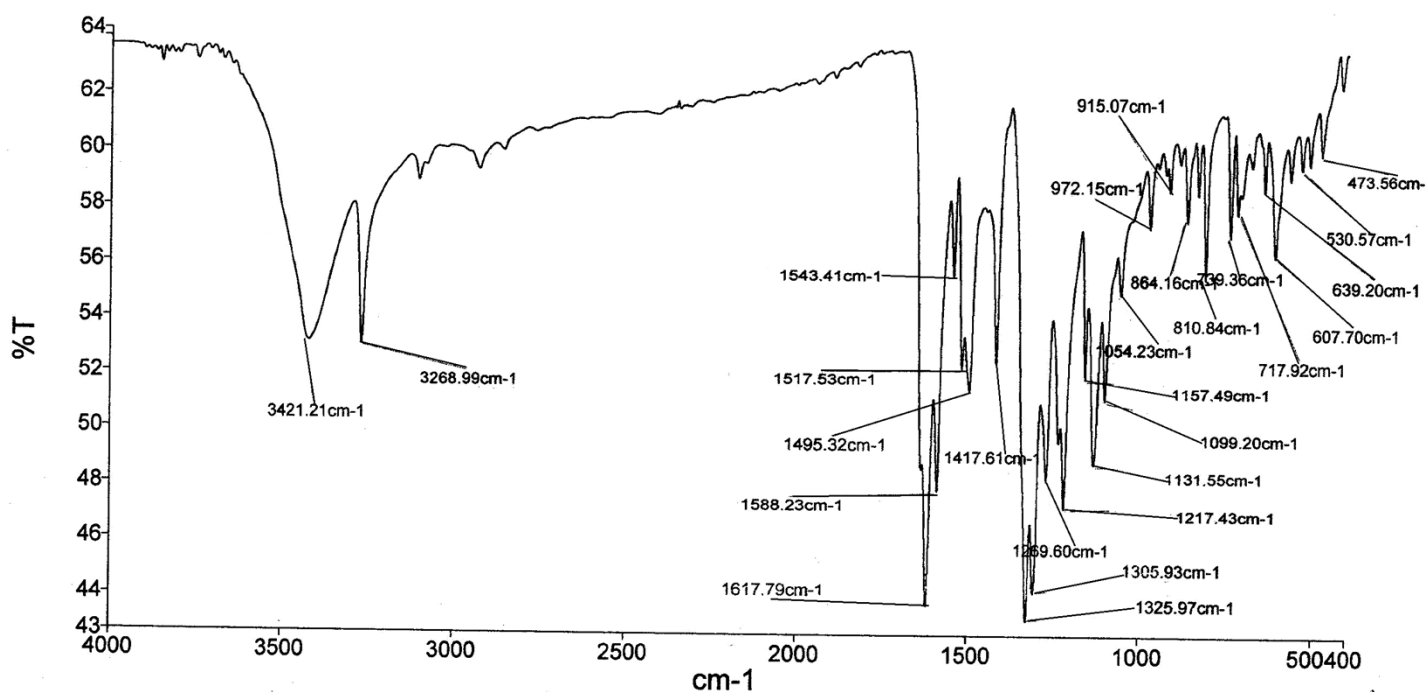

**Fig. 1** IR spectra of DBH.

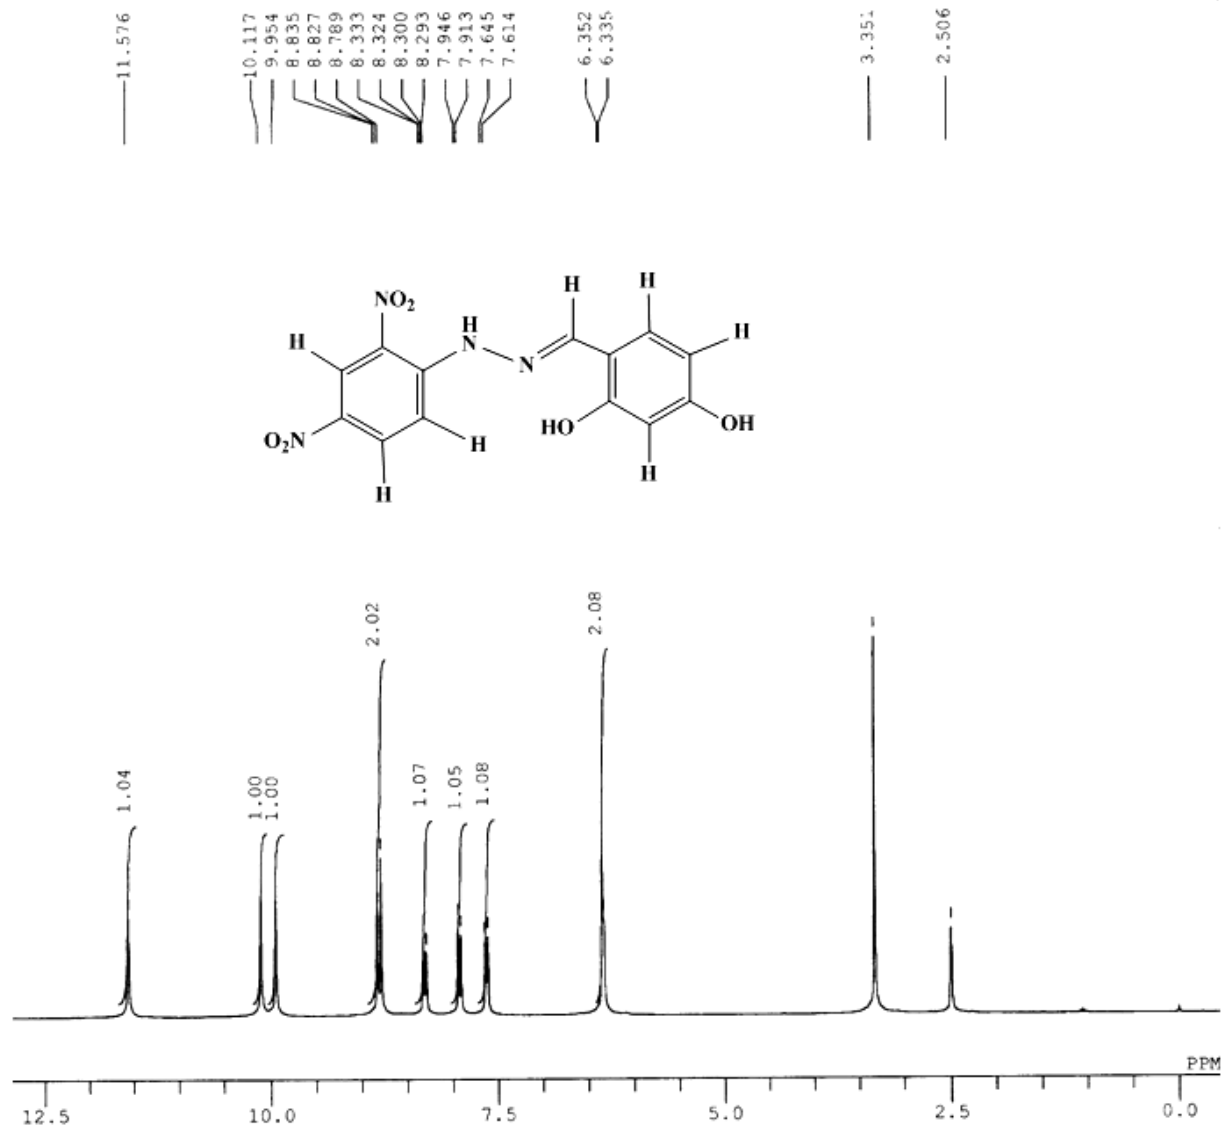

**Fig. 2** <sup>1</sup>H NMR spectra of DBH.

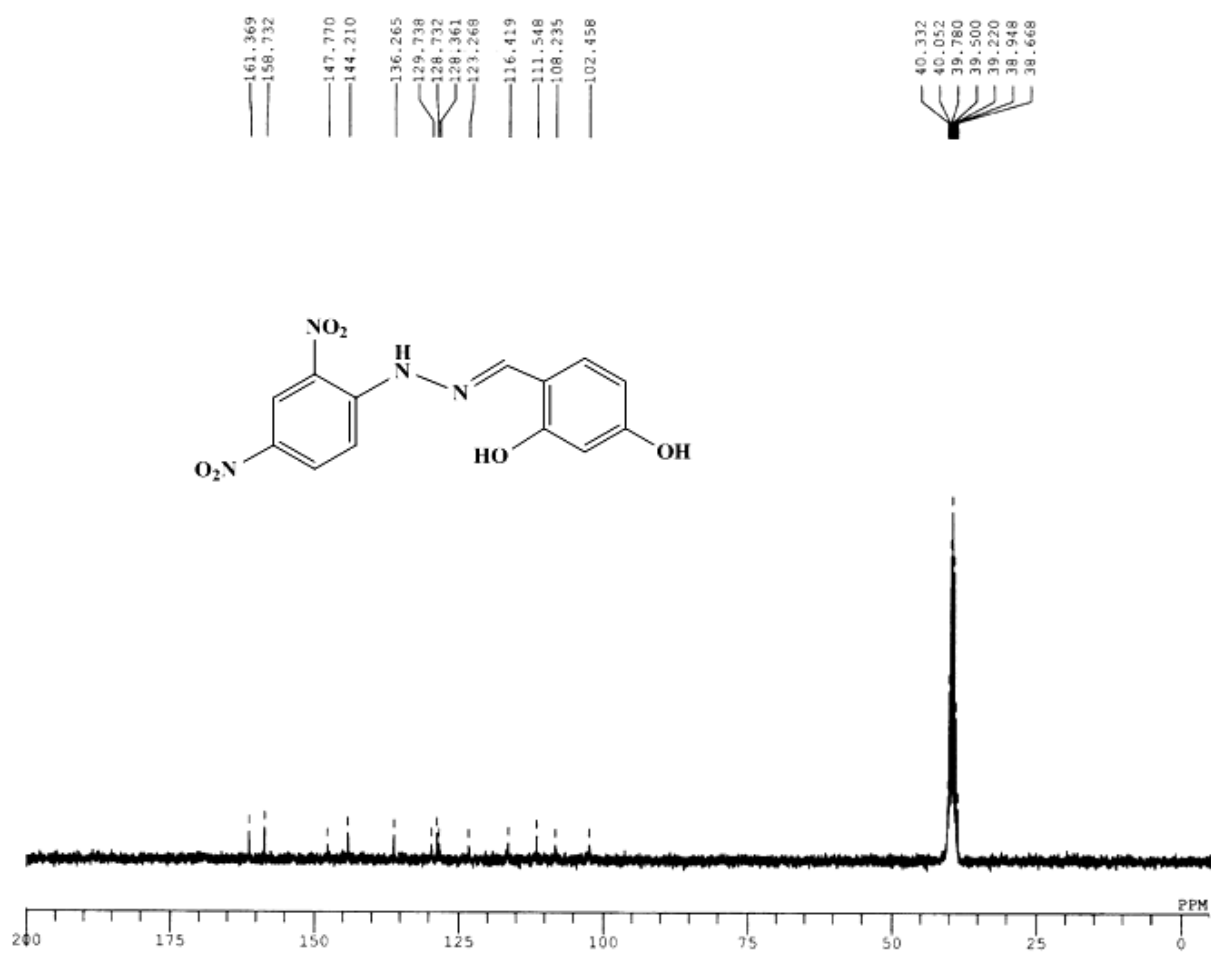

**Fig. 3** <sup>13</sup>C NMR spectra of DBH.

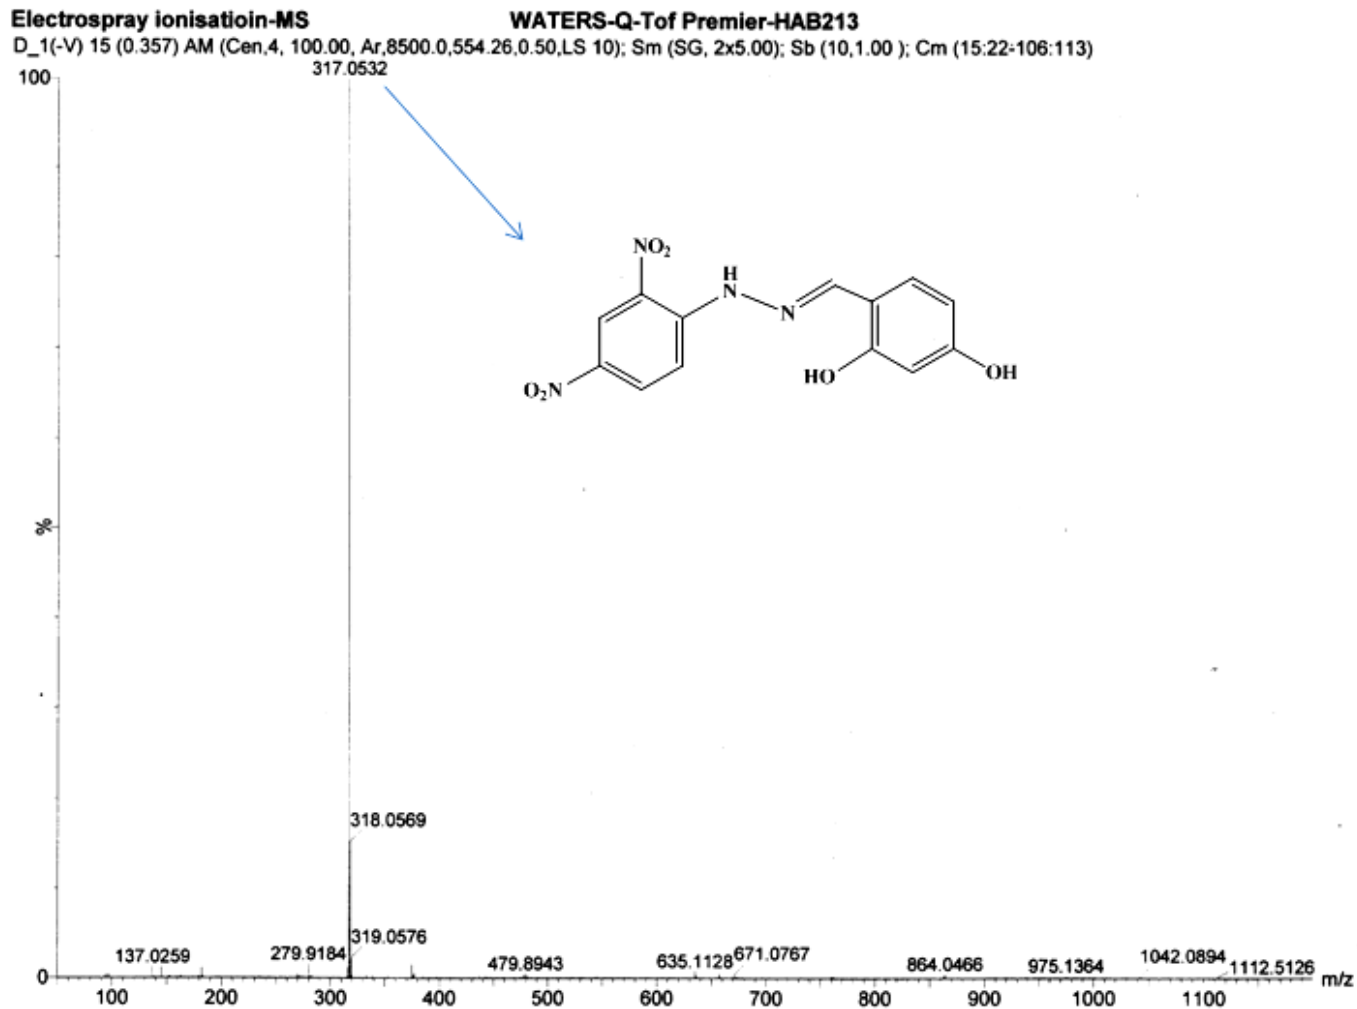

Fig. 4 ESI-MS spectra of DBH.

|                                                                      |                                                                 |
|----------------------------------------------------------------------|-----------------------------------------------------------------|
| Empirical Formula                                                    | C <sub>15</sub> H <sub>16</sub> N <sub>4</sub> O <sub>7</sub> S |
| Formula weight                                                       | 396.38                                                          |
| Temp, K                                                              | 293(2)                                                          |
| $\lambda$ (Å)                                                        | 0.71073                                                         |
| Crystal system                                                       | Monoclinic                                                      |
| Space group                                                          | p21/c                                                           |
| a (Å)                                                                | 19.299                                                          |
| b (Å)                                                                | 6.620                                                           |
| c (Å)                                                                | 14.534                                                          |
| $\alpha = \gamma$ (°)                                                | 90.00                                                           |
| $\beta$                                                              | 102.77                                                          |
| V (Å <sup>3</sup> )                                                  | 1811.0                                                          |
| Z                                                                    | 4                                                               |
| D <sub>calc</sub> (mg/m <sup>3</sup> )                               | 1.454                                                           |
| $\mu$ (mm <sup>-1</sup> )                                            | 0.225                                                           |
| F(000)                                                               | 824                                                             |
| Crystal size (mm)                                                    | 0.25×0.24×0.23                                                  |
| $\theta$ range for data collection (°)                               | 3.26 - 29.23                                                    |
| No. of reflections collected                                         | 7741                                                            |
| No. of independent reflections (R <sub>int</sub> )                   | 4127 ( 0.0403)                                                  |
| Number of data/restraints/parameters                                 | 4127 / 0 / 246                                                  |
| Goodness-of-fit on F <sup>2</sup>                                    | 0.994                                                           |
| R <sub>1</sub> , wR <sub>2</sub> <sup>a,b</sup> [(I>2 $\sigma$ (I))] | 0.0694, 0.1293                                                  |
| R <sub>1</sub> , wR <sub>2</sub> <sup>a,b</sup> (all data)           | 0.1691, 0.1758                                                  |
| Largest difference in peak and hole (e.Å <sup>-3</sup> )             | 0.582 and -0.283                                                |

**Table 1** Crystallographic data of DBH.

| Bond distances (Å) |          | Bond angles (°) |          |
|--------------------|----------|-----------------|----------|
| O1-C2              | 1.358(4) | C7-N1-N2        | 113.9(3) |
| O2-C4              | 1.345(4) | C8-N2-N1        | 121.4(3) |
| O3-N3              | 1.239(4) | O4-N3-O3        | 121.1(3) |
| O4-N3              | 1.223(4) | O4-N3-C9        | 119.3(3) |
| O5-N4              | 1.212(4) | O3-N3-C9        | 119.6(3) |
| O6-N4              | 1.230(4) | O5-N4-O6        | 123.4(3) |
| N1-C7              | 1.291(4) | O5-N4-C11       | 118.9(3) |
| N1-N2              | 1.386(4) | O6-N4-C11       | 117.7(3) |
| N2-C8              | 1.342(4) | N1-C7-C1        | 124.0(3) |
| N3-C9              | 1.442(4) | C6-C1-C2        | 117.2(3) |
| N4-C11             | 1.461(4) | C6-C1-C7        | 119.2(3) |
| C7-C1              | 1.430(4) | C2-C1-C7        | 123.6(3) |
| C1-C6              | 1.404(4) | O1-C2-C1        | 121.5(3) |
| C1-C2              | 1.405(4) | N2-C8-C9        | 122.8(3) |
| S1-O7              | 1.511(3) | N2-C8-C13       | 121.2(3) |
| S1-C14             | 1.755(5) | O7-S1-C14       | 104.8(2) |
| S1-C15             | 1.765(4) | O7-S1-C15       | 105.2(2) |

**Table 2** Selected bond distances (Å) and bond angles (°) for DBH.

| D-H...A          | D-H  | H...A | D...A     | < (DHA) |
|------------------|------|-------|-----------|---------|
| N(2)-H(1)...O(3) | 0.86 | 1.96  | 2.604 (4) | 131     |
| O(1)-H(2)...N(1) | 0.82 | 1.99  | 2.708 (4) | 146     |
| O(2)-H(3)...S(1) | 0.82 | 2.80  | 3.516 (3) | 146     |

**Table 3** Hydrogen bond parameters [ $\text{\AA}$  and  $^\circ$ ] in DBH.

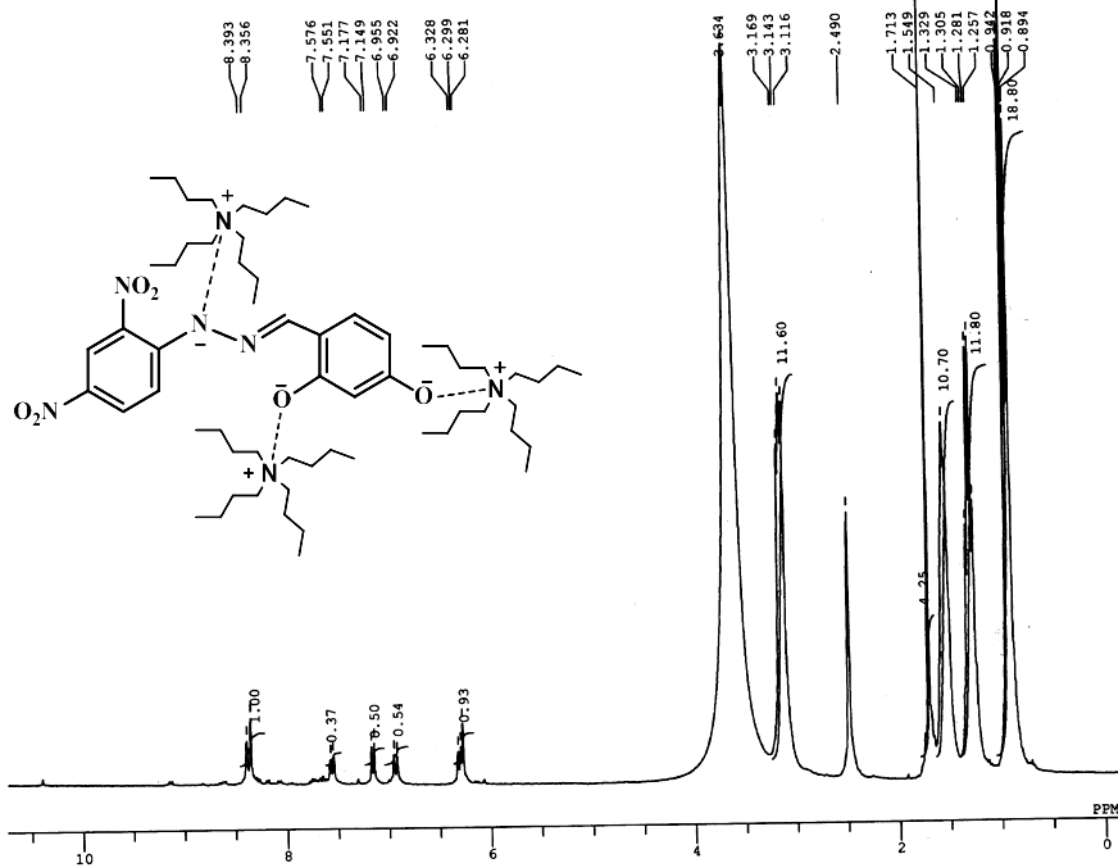

**Fig. 5** <sup>1</sup>H NMR spectra of tetrabutylammonium salt of DBH.



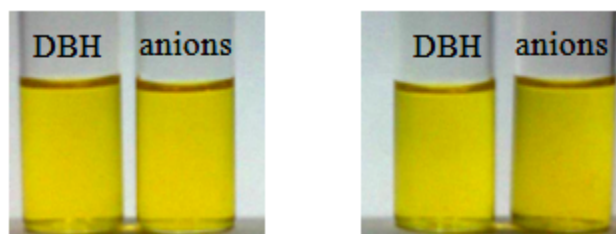

**Fig. 6** Color changes of DBH (50  $\mu\text{M}$ ) in ethanol (left) and methanol (right) upon addition of 1 equivalent of tetrabutylammonium salts of iodide, bromide, fluoride and acetate.

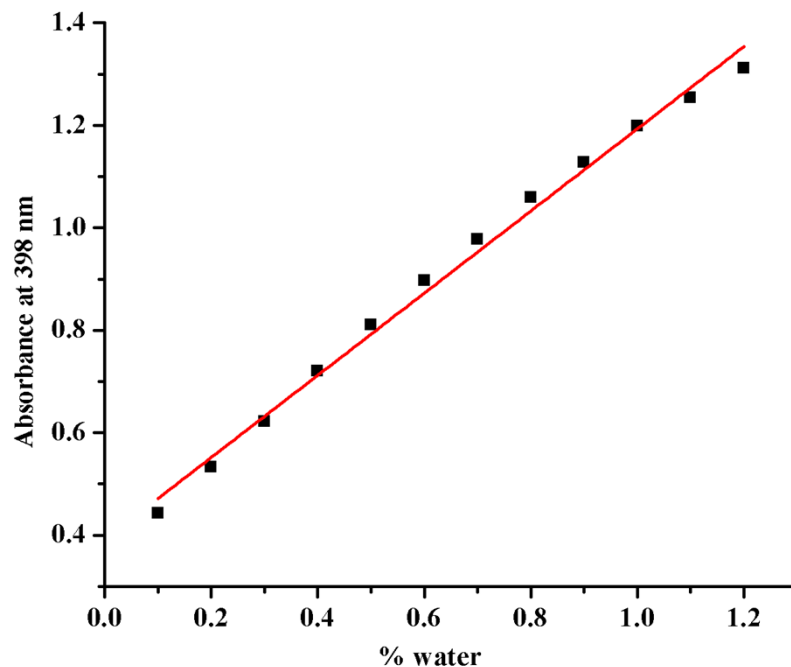

**Fig. 7** Absorbance of deprotonated DBH (50  $\mu$ M DBH + 10 equivalents acetate ions) at 398 nm in acetonitrile as a function of the % water ( $R^2 = 0.9929$ , linear range = 0.1-1.2%).
